# Supplementary material
Source: Springer Nature journal article supplement (https://www.springermedizin.de/resource/supplementary/12888_2007_526_MOESM2_ESM.pdf/9483510)

# Scree Plot of Eigenvalues

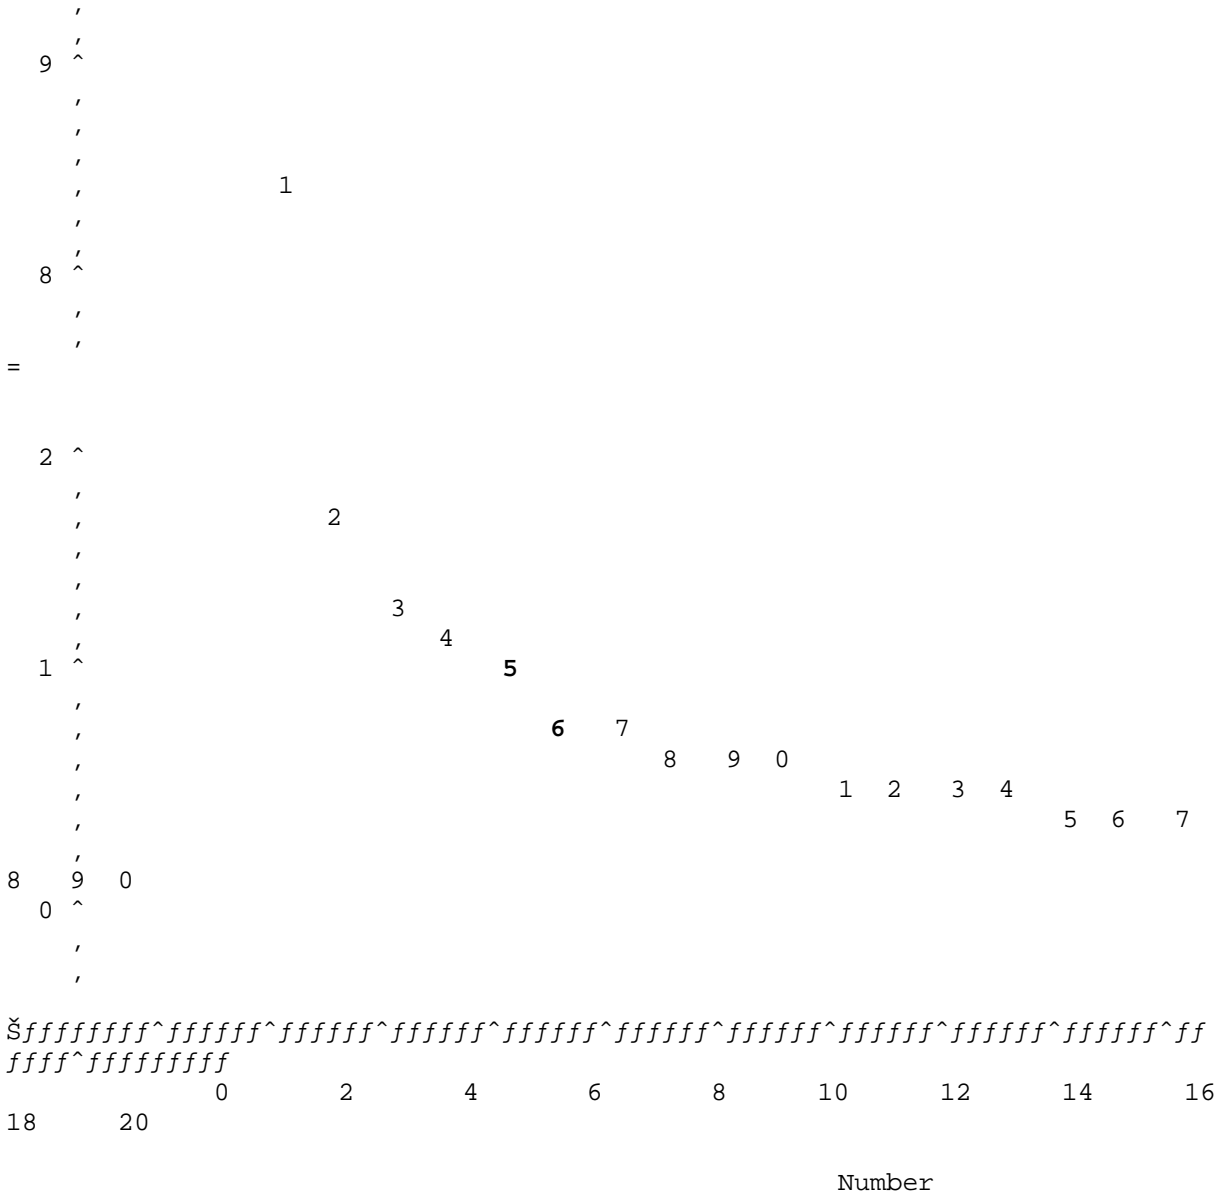

Supplement: MOESM2 [file 9483510]
